# Supplementary material for: Synergistic effect of electroactivity and hydrophobicity on the anticorrosion property of room-temperature-cured epoxy coatings with multi-scale structures mimicking the surface of Xanthosoma sagittifolium leaf
Source: Royal Society of Chemistry journal article supplement (doi:10.1039/c2jm32365f), 2012-01-01
Supplement: c2jm32365f.pdf [file c2jm32365f.pdf]

### The Gloss Values of the Synthesized Epoxy Coatings

Gloss of the sample surface was measured using a laboratory glossmeter (Zehntner, ZLR 1050, Hoelstein, Switzerland). Reflectance was measured at an incidence light angle of  $85^\circ$  from the normal to the sample surface. Gloss was reported as gloss units (GU). Taking the example of EE-0 and EE-10 coatings, the gloss value is 100 GU and 97 GU, respectively. Therefore, the coatings could be considered a high gloss surface. However, the gloss values decrease to almost zero for both HEE-0 and HEE-10 coatings, indicating the replicated multi-scale structure on the coatings' surface significantly reduced the gloss of the coatings.

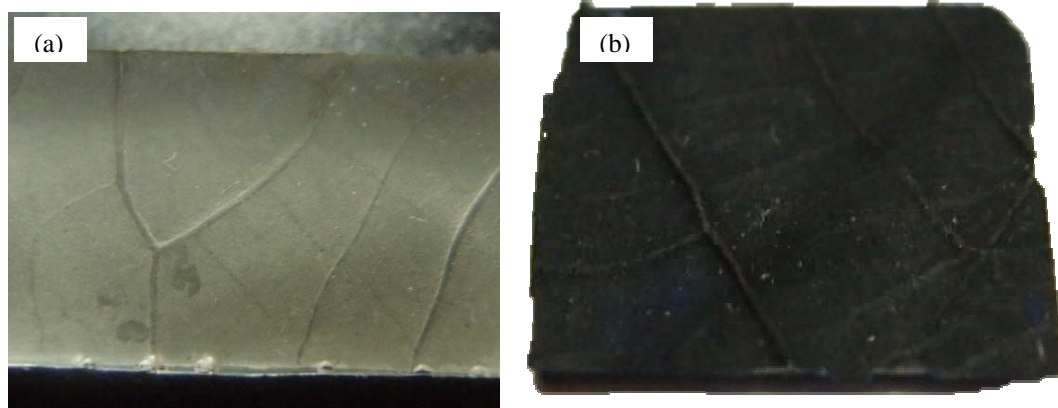

Figure S1. Photography's images of hydrophobic epoxy coatings with the multiscale-structure on their surfaces. (a) HEE-0; (b) HEE-10
